# Supplementary material for: The association of particulate matter PM2.5 and nitrogen oxides from ambient air pollution and mental health of children and young adults- a systematic review
Source: publisher site journal article supplement (doi:10.1515/reveh-2024-0120), 2025-03-12
Supplement: Supplementary file 6 [file j_reveh-2024-0120_suppl_002.docx]

**Supplementary Table 1:**  Quality assessment matrix of included studies

| **Author, Year** | **Selection Bias** | **Study Design** | **Confounders** | **Data Collection Methods** | **Analysis** | **Overall Rating** |
| --- | --- | --- | --- | --- | --- | --- |
| Ahmed, 2022 (65) | ^^^ | ^^^ | ^^^ | ^^^ | ^^^ | *** |
| Becerra, 2013 (17) | ^^^ | ^^ | ^^ | ^^^ | ^^^ | ** |
| Bradley, 2023 (25) | ^^ | ^^ | ^^^ | ^^^ | ^^^ | ** |
| Chang, 2022 (59) | ^^^ | ^^^ | ^^^ | ^^^ | ^^^ | *** |
| Chen, 2018 (50) | ^^ | ^^^ | ^^^ | ^^^ | ^^^ | *** |
| Choi, 2020 (24) | ^^ | ^ | ^^ | ^^^ | ^^^ | ** |
| Fan, 2019 (44) | ^^^ | ^^^ | ^^ | ^^^ | ^^^ | *** |
| Flanagan, 2023 (48) | ^^^ | ^^^ | ^^ | ^^^ | ^^^ | *** |
| Forns, 2016 (32) | ^ | ^^^ | ^^ | ^^^ | ^^^ | * |
| Forns, 2018 (18) | ^^ | ^^^ | ^^^ | ^^^ | ^^^ | ** |
| Fuertes, 2016 (57) | ^^^ | ^^^ | ^^ | ^^^ | ^^^ | *** |
| Geng, 2019 (20) | ^^^ | ^^ | ^^ | ^^^ | ^^^ | ** |
| Gong, 2014 (89) | ^^^ | ^^^ | ^^^ | ^^^ | ^^^ | *** |
| Gong, 2017 (90) | ^^^ | ^^^ | ^^^ | ^^^ | ^^^ | *** |
| Guxens, 2016 (91) | ^^^ | ^^^ | ^^ | ^^^ | ^^^ | *** |
| Harris, 2016 (92) | ^^ | ^^^ | ^^^ | ^^^ | ^^^ | *** |
| Iyanna, 2023 (93) | ^^^ | ^^^ | ^^^ | ^^^ | ^^^ | *** |
| Jiang, 2023 (42) | ^^^ | ^^^ | ^^^ | ^^^ | ^^^ | *** |
| Jo, 2019 (21) | ^^^ | ^^^ | ^^ | ^^^ | ^^^ | ** |
| Joa, 2019 (22) | ^^^ | ^^^ | ^^ | ^^^ | ^^^ | ** |
| Joo, 2021 (63) | ^^^ | ^^^ | ^^^ | ^^^ | ^^^ | *** |
| Jorcano, 2019 (69) | ^^^ | ^^^ | ^^^ | ^^^ | ^^^ | *** |
| Ju, 2023 (68) | ^^^ | ^^^ | ^^^ | ^^^ | ^^^ | *** |
| Jung, 2013 (53) | ^^^ | ^^^ | ^^^ | ^^^ | ^^^ | *** |
| Kaufman, 2019 (23) | ^^ | ^^^ | ^^^ | ^^^ | ^^^ | ** |
| Kerin, 2018 (19) | ^^ | ^^^ | ^^ | ^^^ | ^^^ | ** |
| Kim, 2022 (33) | ^^ | ^^ | ^ | ^^^ | ^^^ | * |
| Kusters, 2022 (94) | ^^ | ^^^ | ^^^ | ^^^ | ^^^ | *** |
| Latham, 2021 (67) | ^^^ | ^^^ | ^^^ | ^^^ | ^^^ | *** |
| Lee, 2023 (26) | ^^ | ^^ | ^^ | ^^^ | ^^^ | ** |
| Lertxundi, 2019 (72) | ^^ | ^^^ | ^^^ | ^^^ | ^^^ | *** |
| Liu, 2018 (43) | ^^^ | ^^^ | ^^ | ^^^ | ^^^ | *** |
| Loftus, 2020 (66) | ^^^ | ^^^ | ^^^ | ^^^ | ^^^ | *** |
| Luminati, 2022 (62) | ^^^ | ^^^ | ^^ | ^^^ | ^^^ | *** |
| Magen-Molho, 2021 (34) | ^^ | ^ | ^^ | ^^^ | ^^^ | * |
| Markevych, 2018 (27) | ^^ | ^^ | ^^ | ^^^ | ^^^ | ** |
| McGuinn, 2020 (29) | ^^ | ^^^ | ^^ | ^^^ | ^^^ | ** |
| McGuinn, 2022 (8) | ^^^ | ^^^ | ^^ | ^^^ | ^^^ | *** |
| Min, 2017 (61) | ^^^ | ^^^ | ^^ | ^^^ | ^^^ | *** |
| Ni, 2022 (71) | ^^^ | ^^^ | ^^^ | ^^^ | ^^^ | *** |
| Oudin, 2019 (54) | ^^^ | ^^^ | ^^ | ^^^ | ^^^ | *** |
| Pagalan, 2019 (73) | ^^^ | ^^^ | ^^ | ^^^ | ^^^ | *** |
| Park, 2020 (55) | ^^^ | ^^^ | ^^ | ^^^ | ^^^ | *** |
| Pham, 2022 (49) | ^^^ | ^^^ | ^^^ | ^^^ | ^^^ | *** |
| Qi, 2023 (35) | ^^ | ^ | ^^^ | ^^^ | ^^^ | * |
| Rahman, 2022 (46) | ^^^ | ^^^ | ^^^ | ^^^ | ^^^ | *** |
| Rahman, 2023 (47) | ^^^ | ^^^ | ^^^ | ^^^ | ^^^ | *** |
| Raz, 2015 (95) | ^^^ | ^^^ | ^^ | ^^^ | ^^^ | *** |
| Raz, 2018 (28) | ^^ | ^^^ | ^^ | ^^^ | ^^^ | ** |
| Ren, 2019 (36) | ^ | ^ | ^^ | ^^^ | ^^^ | * |
| Roberts, 2019 (56) | ^^^ | ^^^ | ^^ | ^^^ | ^^^ | *** |
| Santos, 2023 (37) | ^^ | ^ | ^^^ | ^^^ | ^^^ | * |
| Sentis, 2017 (96) | ^^ | ^^^ | ^^^ | ^^^ | ^^^ | *** |
| Shih, 2020 (30) | ^^ | ^^^ | ^^ | ^^^ | ^^^ | ** |
| Shin, 2022 (38) | ^ | ^^^ | ^^ | ^^^ | ^^^ | * |
| Talbott, 2015 (51) | ^^^ | ^^^ | ^^ | ^^^ | ^^^ | *** |
| Thygesen, 2020 (58) | ^^^ | ^^^ | ^^^ | ^^^ | ^^^ | *** |
| Tokuda, 2023 (64) | ^^^ | ^^^ | ^^ | ^^^ | ^^^ | *** |
| Volk, 2013 (45) | ^^^ | ^^^ | ^^ | ^^^ | ^^^ | *** |
| Wang, 2021 (52) | ^^^ | ^^^ | ^^ | ^^^ | ^^^ | *** |
| Yu, 2022 (31) | ^^ | ^^^ | ^^ | ^^^ | ^^^ | ** |
| Yuchi, 2022 (60) | ^^^ | ^^^ | ^^^ | ^^^ | ^^^ | *** |

| **Quality Assessment Matrix of Included Studies** | **aWeak** | **bModerate** | **cStrong** |
| --- | --- | --- | --- |
| Individual Scale Rating | ^ | ^^ | ^^^ |
| **Overall Rating** | ***** | ****** | ******* |
| **Quality assessment ratings: a**Weak (one or more weak individual scale ratings); **b**Moderate (more than one moderate individual scale rating); **c**Strong (no weak or just one moderate individual scale rating). | | | |

**Supplementary Table 2:** Associations between exposure to ambient air pollutants and autism spectrum disorder (ASD)

| **Author, year** | **Pollutant(s)** | **Exposure window** | **┼Key association** | **Exposure measurement** | **Effect estimates** | **Overall study quality** |
| --- | --- | --- | --- | --- | --- | --- |
| Becerra, 2013 (17) | PM2.5 | Gestation | **+** | Daily averages for the gaseous pollutants and 24-hr measurements of PM2.5 (col­lected every 6 and 3 days, respectively) were then averaged over the different pregnancy periods | aOR: 1.07 (95% CI: 1.00-1.15) per 4.68-µg/m3 increase in PM2.5 and aOR: 1.07 (95% CI: 1.01-1.12) per 5.54 ppb increase in NO2. | ** |
| NO2 | Gestation | **+** |
| Chen, 2018 (50) | PM2.5 | Birth till childhood (0-3 yrs) | **+** | Ground measured PM2.5 data from 1497 stations of China National Environmental Monitoring Center (CNEMC).  Daily concentrations of PM2.5 via Random Forests Models Participants' mean exposures during the first three years of life estimated according to their home addresses and dates of birth | Cumulative ORs per IQR increase in PM2.5 from birth-3 yrs: 1.78 (95% CI: 1.14, 2.76).  ORs for 1st year of life: 1.07 (95% CI: 0.80, 1.43), ORs for 2nd year of life: 1.50 (95% CI: 1.01, 2.22), ORs for 3rd year of life: 1.78 (95% CI: 1.05, 3.02) | *** |
| 1st year of life | **-** |
| 2nd year of life | **+** |
| 3rd year of life | **+** |
| Flanagan, 2023 (48) | PM2.5 | Gestation | **+** | A Gaussian plume air dispersion model to extrapolate total PM2.5 concentrations at a 100 m, then aggregated into yearly concentrations to derive annual mean concentrations | ORs of 1.34 (95% CI 1.05–1.70) for all-source PM2.5, 1.18 (95% CI 1.01–1.39) for PM2.5 from small-scale residential heating, 1.46 (95% CI 1.15–1.85) for PM2.5 from tailpipe exhaust, and 1.36 (95% CI 1.10–1.68) for PM2.5 from vehicle wear-and-tear | *** |
| Geng, 2019 (20) | PM2.5 | Birth till childhood (0-3 yrs) | **+** | Monthly exposure predictions of PM2.5 from U.S Embassy Beijing Air Quality Monitor. Monthly average concentrations for participants estimated as per residential address | OR 1.018, 95% CI: 1.009-1.032; p = 0.018.  ASD odds higher for higher PM2.5 concentrations,  3rd quartile OR = 2.03; (95%CI: 1.13–5.54; p = 0.015)  4th quartile OR = 4.15 (95%CI: 2.04–9.45; p = 0.002)  Correlation between serum levels of PM2.5 and the Autism Severity CARS score (r = 0.259; p = 0.010) | ** |
|  |
|  |
|  |
|  |
| Gong, 2014 (89) | NOx | Gestation through Childhood | **-** | Relevant residential addresses of the study subjects were geocoded, and NOx levels were estimated at these coordinates from the dispersion models to calculate annual average concentrations for NOx | First Year of Life  ASD (OR: 0.86, 95% CI: 0.44-1.67)  ADHD (OR:1.06, 95% CI: 0.71-1.59)  Similar results for exposures during each trimester of pregnancy and at 9 years of age | *** |  |
| 1st Trimester | **-** |  |
| 2nd Trimester | **-** |  |
| 3rd Trimester | **-** |  |
| 1st year of life | **-** |  |
| 9th year of life | **-** |  |
| Gong, 2017 (90) | NOx | Gestation through Infancy |  | Relevant residential addresses of the study subjects were geocoded and NOx levels were estimated at these coordinates from the dispersion models to calculate annual average concentrations for NOx | During Gestation:  aOR: 1.02 (95% CI: 0.94, 1.10) for ASD per 20-ug/m3 increase of NOx  aOR: 1.06 (95% CI: 0.89, 1.26) for ASD with ID, and  aOR: 1.01 (95% CI: 0.93, 1.10) for ASD without ID]  Similar results during 1st year of life | *** |  |
| Gestation | **-** |  |
| 1st year of life | **-** |  |
| Guxens, 2016 (91) | PM2.5 | Gestation | **-** | NO2, NOx and PM2.5 were estimated for birth addresses by land-use regression models with backwards extrapolation to obtain average pregnancy concentrations | No association found after adjusting for several socioeconomic status variables and urbanicity | *** |  |
| NO2 | Gestation | **-** |  |
| Iyanna, 2023 (93) | PM2.5 | Gestation | **-** | Daily estimates of air pollutants were aggregated to derive average exposures for each pollutant during two time periods: 1) pregnancy and 2) exposure during the participant’s first year of life (date of birth to first birthday) | SRS Total T-scores and NO2 exposure during prenatal (ʙ = 0.4, 95% CI: 0.7, 1.6) and first year of life (ʙ = 0.7, 95% CI: 0.3, 1.6). | *** |  |
| NO2 | Gestation | **-** |  |
| Jo, 2019 (21) | PM2.5 | Pre-gestation through Infancy | **+** | Birth certificate residential addresses were geocoded using MapMarker USA Version 28.0.0.11. Monthly averages for PM2.5 and NO2 between 1998–2009 were obtained from data compiled from the EPA regional air quality monitoring network | Significant associations per 6.5 ug/m3 PM2.5 exposure:  Pre-gestation: (HR = 1.11, 95% CI: 1.03, 1.20),  Gestation (HR = 1.17 per 6.5 ug/m3, 95% CI: 1.04, 1.33),  the first trimester (HR = 1.10, 95% CI: 1.02, 1.19) and  the third trimester (HR = 1.08, 95% CI: 1.00, 1.18)  First year of life (HR = 1.21, 95% CI: 1.05) | ** |  |
| Pre-gestation | **+** |  |
| 1st Trimester | **+** |  |
| 3rd Trimester | **+** |  |
| 1st year of life | **+** |  |
| NO2 | Pre-gestation through Infancy | **-** |  |
| Joa, 2019 (22) | PM2.5 | Gestation through Infancy | **-** | Birth certificate residential addresses were geocoded using MapMarker USA Version 28.0.0.11. Monthly averages for PM2.5 and NO2 between 1998–2009 were obtained from data compiled from the EPA regional air quality monitoring network | Increased ASD risk per 6.5 µg/m3 PM2.5 in boys (HR = 1.18, 95% CI: 1.08, 1.27).  No associations were observed among girls (HR = 0.90 per 6.5 µg/m3, 95% CI: 0.76, 1.07) | ** |  |
| Gestation | **+** only in boys |  |
| Infancy |  |  |
| NO2 | Gestation through Infancy | **-** |  |
| Jung, 2013 (53) | NO2 | Childhood | **+** | Monthly average data 70 Taiwan Environmental Protection Agency (EPA) monitoring station to obtain yearly mean concentrations, which were then assigned to individuals by post-code levels | Increased ASD risk per 10-ppb increase in NO2 over preceding years: 1st year HR: 4.43 (95% CI: 3.33-5.90), 2nd yr HR: 4.75 (95% CI: 3.54-6.39), 3rd year HR: 3.56 (95% CI: 2.60-4.87), 4th yr HR: 3.14 (95% CI: 2.25-4.39); with a cumulative 340% risk increase per 10 ppb increase in NO2 level (95% CI 3.31–5.85) | *** |  |
| 1st yr Preceding | **+** |  |
| 2nd yr Preceding | **+** |  |
| 3rd yr Preceding | **+** |  |
| 4th yr Preceding | **+** |  |
| Kaufman, 2019 (23) | PM2.5 | Gestation through Infancy | **+** | Daily PM2.5 estimates for 2005–2012 from US EPA’s Fused Air Quality Surface Using Downscaling model to each participant based on the mother’s census tract of residence at birth. 24-hour-average PM2.5 estimates calculated across the 3 trimesters, entire pregnancy period, the 1st and 2nd years after birth. Cumulative Exposure Index (CEI) based on pregnancy through the 2nd year after birth | For each IQR increase in PM2.5  Pregnancy to 2nd yr: aOR=1.17 (95% CI: 0.98, 1.40)  1st year: aOR=1.11 (95% CI: 1.00, 1.23) | ** |  |
| 1st Trimester | **-** |  |
| 2nd Trimester | **-** |  |
| 3rd Trimester | **-** |  |
| 1st year of life | **+** |  |
| Kim, 2022 (33) | PM2.5 | Childhood (short-term) | **+** | PM2.5 levels were estimated using the Integrated Multi-Scale Air Quality System for Korea. Data on NO2 levels in each region were obtained from 318 fixed-site monitoring stations of the National Ambient Air Monitoring Information System | Short-term exposure to PM2.5 and NO2 was associated with a higher risk of hospital admissions for ASD.  PM2.5 levels at lag day 1 and NO2 levels at lag day 5 were associated with a higher risk of hospital admissions for ASD (RR=1.17, 95% CI 1.10 to 1.25 for PM2.5; RR=1.09, 95%CI 1.01 to 1.18 for NO2) | * |  |
|  | NO2 | Childhood (short-term) | **+** |  |
| Lee, 2023 (26) | PM2.5 | Gestation | **+** | The measured data PM2.5 and NO2 from January 2015 to December 2018 were extracted from the Korea Environment Corporation and matched based on the mother’s health insurance claim registration area during pregnancy | For entire gestation:  ORs for PM2.5 were 1.05 (95% CI:1.04-1.06).  ORs for NO2 1.44 (95% CI: 1.36-1.55)  Similar significant associations for both pollutants throughout all trimesters | ** |  |
| 1st Trimester | **+** |  |
| 2nd Trimester | **+** |  |
| 3rd Trimester | **+** |  |
| NO2 | Gestation | **+** |  |
| 1st Trimester | **+** |  |
| 2nd Trimester | **+** |  |
| 3rd Trimester | **+** |  |
| Magen-Molho, 2021 (34) | PM2.5 | Gestation through Childhood | **-** | Daily estimates of PM2.5 concentrations were available from spatiotemporally resolved hybrid models Individual-level average exposure estimates for each child according to the official maternal address at birth, birth date, and gestational age at birth were assigned and all the addresses at the house level geocoded | Postnatal exposures to NOx (OR= 1.19, 95% CI = 1.02, 1.38)  Postnatal exposures to NO2(OR = 1.20, 95% CI = 1.00, 1.43) | * |  |
| NOx | Gestation through Childhood |  |  |
| Gestation | **-** |  |
| Childhood | **+** |  |
| NO2 | Gestation | **-** |  |
| Childhood | **+** |  |
| McGuinn, 2020 (29) | PM2.5 | Pre-gestation through Infancy |  | A satellite-based model to assign daily averages during 3 months before pregnancy; each trimester of pregnancy; the entire pregnancy; and the first year of life | OR for PM2.5 exposure during the first year of life: 1.3 (95% CI: 1.0, 1.6) per 1.6 µg/m3 increase in PM2.5 | ** |  |
| Pre-gestation | **-** |  |
| 1st Trimester | **-** |  |
| 2nd Trimester | **-** |  |
| 3rd Trimester | **-** |  |
| 1st year of life | **+** |  |
| Oudin, 2019 (54) | NOx | Gestation | **+** | The modelled concentration of (NOx) linked to the geocoded residential address of mothers. Trimester-specific exposure quartiles as well as average exposure levels during the full pregnancy were then calculated. In the main analysis, year-specific quartiles were used | aORs for a 10 ug/m3 increase in NOx for 1st trimester: 1.15 (95% CI: 1.01-1.31).  aOR for 3rd trimester: 1.39 (95% CI: 1.01–1.9) and  aOR all pregnancy: 1.40 (95% CI: 1.02–1.93) | *** |  |
| 1st Trimester | **+** |  |
| 2nd Trimester | **-** |  |
| 3rd Trimester | **+** |  |
| Pagalan, 2019 (73) | PM2.5 | Gestation | **-** | Monthly mean exposures PM2.5, NOx), and NO2 at the maternal residence during pregnancy were estimated with temporally adjusted, high-resolution land use regression models | Exposure to NO (aOR, 1.07 [95% CI, 1.01-1.13])  ORs in male children were higher than female in stratified models | *** |  |
| NOx | **+** |  |
| NO2 | **-** |  |
| Pham, 2022 (49) | PM2.5 | Gestation | **+** | Satellite-based land-use regression (LUR) models were used to estimate annual mean exposure to nitrogen dioxide (NO2, units: parts per billion (ppb)) and PM2.5 (units: µg/m3) at each infant’s residential address in their birth year (2010–2013) | Exposures to PM2.5 with symptoms of ASD at age of 2 years. [ʙ=0.17 units per µg/m3 increase; 95% CI (0.02, 0.32); p=0.02] ASP raw score diagnosis and OR=1.64 (95% CI: 1.07-2.52) for ASD borderline/clinical range (>60, borderline/clinical range) at age 2 years | *** |  |
| NO2 | Gestation | **-** |  |
| Rahman, 2022 (46) | PM2.5 | Gestation | **+** | Weekly averages of mother's daily gestational exposure | The cumulative HR for the first two trimesters was 1.14 per IQR (7:4 ug/m3) increase in PM2:5 (95% CI: 106, 123).  HR for entire pregnancy: (HR: 1.17, 95% CI: 1.08-1.27).  Sex-stratified PM2:5 associations during pregnancy were stronger among boys [boys HR = 1:19 (95% CI: 1.09, 1.31) | *** |  |
| 1st Trimester | **+** |  |
| 2nd Trimester | **+** |  |
| 3rd Trimester | **-** |  |
| NO2 | Gestation | **-** |  |
| Rahman, 2023 (47) | PM2.5 | Gestation | **+** | Monthly estimates of PM2.5 were obtained from the WUACAG hybrid model (version V4.NA.02) and SO-CTM model. Exposures to PM2.5 were assigned to maternal address during the entire pregnancy, first trimester, second trimester, and third trimester | Prenatal PM2.5 with ASD [HR 1.10 (95% CI: 1.02, 1.19) in SO-CTM model] and  [HR 1.07 (95% CI:1.02, 1.11) in WUACAG Hybrid Model] | *** |  |
| Raz, 2015 (95) | PM2.5 | Pre-gestation through Infancy |  | Monthly ambient exposure predictions of airborne particulate matter ≤ 2.5 μm (PM2.5) were generated from nationwide expansions of previously validated spatiotemporal models | aOR per IQR higher PM2.5 (4.40 ug/m3) during pregnancy: 1.50 (95% CI: 1.22, 2.03).  In a mutually adjusted model including all three PM2.5 exposure models, ASD was significantly associated only with exposure during the pregnancy period (OR=1.63, 95% CI: 1.08-2.47) | *** |  |
| Pre-gestation | **-** |  |
| Gestation | **+** |  |
| 1st year of life | **-** |  |
| Raz, 2018 (28) | NO2 | Gestation through Infancy |  | The estimates were calculated using an area-weighted average of the nitrogen dioxide estimates of the exposure model in the relevant grid points that comprise the small statistical areas or the city boundaries | Increased risk of ASD (per 5.85-ppb increment during pregnancy OR= 1.08 (95% CI: 1.01, 1.15) and during the 9-month period after birth OR = 1.09 (95% CI: 1.02, 1.18) | ** |  |
| Gestation | **+** |  |
| 1st year of life | **+** |  |
| Santos, 2023 (37) | PM2.5 | Gestation through Infancy |  | An estimated average annual level for PM2.5, NO2 for each five time periods: first, second and  third trimesters of pregnancy, full pregnancy and the first year of the child’s life and assigned birth address | Increased ASD severity with PM2.5 exposure during the first trimester (p = 0.002; OR = 1.14, 95%CI: 1.05-1.23) and full pregnancy (p = 0.04; OR = 1.07, 95%CI: 1.00-1.15) | * |  |
| 1st Trimester | **+** |  |
| Full pregnancy | **+** |  |
| 1st year of life | **-** |  |
| NO2 | Gestation through Infancy | **-** |  |
| Talbott, 2015 (51) | PM2.5 | Pre-gestation through Infancy | **+** | A land use regression (LUR) model to create person- and time-specific PM2.5 estimates for individual (pre-pregnancy, trimesters one through three, pregnancy, years one and two of life) and cumulative (starting from pre-pregnancy) key developmental time periods | Year 2 of life: per 2.84 μg/m3 (IQR) of PM2.5: aOR: 1.45 (95% CI: 1.01–2.08, p: 0.042)  Pre-pregnancy through year 2: aOR: 1.51 (95% 1.01-2.26, p: 0.046) | *** |  |
| Pre-gestation | **-** |  |
| Gestation | **-** |  |
| Ist year of life | **-** |  |
| 2nd year of life | **+** |  |
| Volk, 2013 (45) | PM2.5 | Gestation through Infancy | **+** | The CALINE4 line-source air quality dispersion model to estimate average concentrations of PM2.5 and NO2 for the specific locations and time periods (trimesters of gestation and first year of life) for each participant | Regional exposure measures of NO2 and PM2.5 during throughout pregnancy (aOR 1.81[95% CI: 1 .37-3.09]; 2.08 [95% CI: 1.93-2.25]), second trimester ( aOR 1.61 [95% CI: 1.15-2.25]; aOR 1.48 ]95% CI: 1.40-1.57]), third trimester (aOR 1.64 [95% CI:1.18-2.29]; aOR 1.40 [95% CI: 1.11-1.77) respectively, and during the first year of life (exposure to NO2: aOR, 2.06 [95% CI: 1.37-3.09]; exposure to PM2.5: AOR, 2.12 [95% CI: 1.45-3.10]  Whereas exposure to only NO2 during the first trimester were significantly associated with increased odds of autism (aOR 1.44 [95% CI: 1.05-1.20]) | *** |  |
| 1st Trimester | **-** |  |
| 2nd Trimester | **+** |  |
| 3rd Trimester | **+** |  |
| 1st year of life | **+** |  |
| NO2 | Gestation through Infancy | **+** |  |
| 1st Trimester | **+** |  |
| 2nd Trimester | **+** |  |
| 3rd Trimester | **+** |  |
| 1st year of life | **+** |  |
| Wang, 2021 (52) | NO2 | Gestation | **+** | Daily average value of each air pollutant from the hourly measurements made by the 69 automatic monitoring stations at township levels maintained by Environmental Protection Administration on Taiwan Island from 1 January 1995 to 31 December 2000 | An increase of 10 ppb in the level of NO2 in the first, second, and third trimester was associated with an HR of 1.39 (95% CI: 1.22-1.58), 1.25 (95% CI: 1.10-1.42), and 1.18 (95% CI:1.03-1.34), 1.42 (95% CI: 1.22-1.66) for entire pregnancy, respectively | *** |  |
| 1st Trimester | **+** |  |
| 2nd Trimester | **+** |  |
| 3rd Trimester | **+** |  |

**┼**: [**+**] Statistically significant, [**-**] Statistically Non – significant

**Supplementary Table 3:** Associations between exposure to ambient air pollutants and attention deficit hyperactivity disorder (ADHD)

| **Author, year** | **Pollutant (s)** | **Exposure window** | **┼Key association** | **Exposure measurement** | **Effect estimates** | **Overall study quality** |
| --- | --- | --- | --- | --- | --- | --- |
| Chang, 2022 (59) | PM2.5 | Gestation through Childhood | **+** | Daily PM2.5 concentrations were derived from a 1-km satellite-based estimation model average PM2.5 concentration | 10 ug/m3 increase in PM2.5 during the first trimester (HR = 1.26; 95% CI: 1.13-1.40).  10 ug/m3 increase in PM2.5 from the first to third years of life (HR: 1.40-1.87)  When stratified by sex, stronger effect for boys (HR = 1.33; 95% CI: 1.17-1.51, and HR = 1.87; 95% CI: 1.48-2.37 for exposure at the first trimester and the third year of life, respectively) than in girls (HR =1.08, 95% CI: 0.88-1.32, and HR = 1.85; 95% CI: 1.24-2.7) | *** |
| 1st Trimester | **+** |
| 2nd Trimester | **-** |
| 3rd Trimester | **-** |
| 1-3 Year of Life | **+** |
| Forns, 2016 (32) | NO2 | Childhood | **-** | Weekly averaged NO2 concentrations were measured using Gradko Environmental passive dosimeters. Annual outdoor school levels were obtained by averaging the results | Outdoor NO2 was not statistically associated with ADHD symptomatology | * |
| Forns, 2018 (18) | PM2.5 | Gestation | **-** | Annual average air pollution concentrations at each participant’s home address at birth were estimated for the whole pregnancy period by land-use regression models | OR for ADHD symptoms was 0.98, 95% CI = 0.80, 1.19 per 5 µg/m3 increase in PM2.5 and 0.95, 95% CI = 0.89, 1.01 per 10 µg/m3 increase in NO2 | ** |
| NO2 | Gestation | **-** |
| Fuertes, 2016 (57) | PM2.5 | Childhood | **+** | Long-term (annual average) concentrations of NO2, PM2.5 mass were estimated to each participant's home address at birth, 10 years and 15 years using land-use regression (LUR) models originally derived as part of the “European Study of Cohorts for Air Pollution Effects” | For ADHD: significant associations with PM2.5 mass estimated to the 10- and 15-year addresses (1.12 [95% CI: 1.01, 1.23] and 1.11 [95% CI: 1.01, 1.22]). No significant association with NO2 exposures across birth, 10 years, and 15 years addresses | *** |
| NO2 | Childhood | **-** |
| Gong, 2014 (89) | NOx | Gestation through Childhood | **-** | Relevant residential addresses of the study subjects were geocoded, and NOx levels were estimated at these coordinates from the dispersion models to calculate annual average concentrations for NOx | Exposure to NOx during the first year of life was not associated ADHD (OR:1.06, 95% CI: 0.71-1.59) Similar results for exposures during each trimester of pregnancy and at 9 years of age | *** |
| 1st Trimester | **-** |
| 2nd Trimester | **-** |
| 3rd Trimester | **-** |
| 1st year of life | **-** |
| 9th year of life | **-** |
| Markevych, 2018 (27) | NO2 | Childhood | **+** | Annual average NO2 concentrations derived by land use regression modelling and population-weighted mean values of nitrogen dioxide (NO2) were calculated for 186 postal code areas | Increase in NO2 levels by 10 μg/m3 raised the relative risk of ADHD by a factor of (RR=1.32, 95% CI: 1.1-1.58) | ** |
| Min, 2017 (61) | NO2 | Gestation | **+** | Data on NO2 was obtained from the National Ambient air Monitoring System (NAMIS) from January 2002 to December 2012 and cumulative exposure levels of NO2 from birth to diagnosis of ADHD (or to the end of study) using annual mean values were calculated | With an increase in 1 ug/m3 of NO2, the HRs for ADHD 1.03 (95% CI: 1.02-1.04).  Infants in the highest NO2 tertile (Tertile3) had an HR of 2.16 (95% CI: 1.61-2.90) for ADHD as compared with the reference group (p < 0.0001) | *** |
| Oudin, 2019 (54) | NOx | Gestation | **-** | The modelled concentration of (NOx) linked to the geocoded residential address of mothers. Trimester-specific exposure quartiles as well as average exposure levels during the full pregnancy were then calculated | For ADHD, ORs increased to 1 but were not significant | *** |
| Park, 2020 (55) | NO2 | Childhood (short-term) | **+** | The region-specific daily concentrations of NO2 were estimated from 24-h monitoring data from 318 government operated monitoring site with estimated daily mean concentrations of air pollutants in each monitoring site | An IQR increase in NO2 levels was associated with higher risk of ADHD-related hospital admissions for lag 1, 2, 3, and 4 in the single-day lag models (largest association for lag 3, RR = 1.47, 95% CI: 1.25, 1.73). When stratified by age, the associations were stronger among adolescents aged 15-19 years than those aged 10- 14 years for NO2 (RR = 1.36, 95% CI: 1.19, 1.57 among those aged 10-14 years and RR = 1.70, 95% CI: 1.33, 2.18 among those aged 15-19 years) | *** |
| Roberts, 2019 (56) | PM2.5 | Childhood | **-** | Annual average pollution exposure estimates were based on the latitude-longitude coordinates of the twins’ residential addresses in 2007, when the twins were aged 12 years, and derived at a 20 m × 20 m resolution from the KCL urban model | No significant associations between both PM2.5 and NO2 exposure at age 12 and symptoms of, ADHD | *** |
| NO2 | Childhood | **-** |
| Shih, 2020 (30) | NOx | Gestation | **+** | Exposure to air pollutants during gestation was estimated through ordinary kriging based on data from air monitoring stations of Environmental Protection Administration, Taiwan. Every participant's home address was geocoded to the township level and linked it to the mean exposure concentration to determine their personal exposure | gestational exposure to NOx (OR=1.28, 1.08-1.52) during pregnancy was found to be associated with ADHD. Among NOx or NO2, NOx was the significant factor for hyperactivity (adjusted OR per 3.14 ppb: 1.26, 95% CI: 1.09-1.46). | ** |
| NO2 | Gestation | **-** |
| Thygesen, 2020 (58) | PM2.5 | Childhood | **+** | Daily concentrations of NO2 and PM2.5 to estimate exposure to ambient air pollution using THOR modeling system which covers the years 1979–2015. The residential address daily concentrations of NO2 and PM2.5 by geographical coordinates, and the average exposure estimated between birth and the fifth birthday, accounting for residential changes | The aIRR (adjusted incidence relative risk) for ADHD 1.38 (1.35 to 1.42) per 10 ug/m3 increase in NO2 and 1.51 (1.41 to 1.62) per 5 ug/m3 increase in PM2.  RR for ADHD for exposure to the highest quintile of NO2 1.70- (1.61 to 1.78) and for highest quintile of PM2.5 1.63-fold (1.52 to 1.76) | *** |
| NO2 | Childhood | **+** |
| Yuchi, 2022 (60) | PM2.5 | Childhood | **+** | National land use regression (LUR) models provided by CANUE (Canadian Urban Environmental Health Research Consortium, canue. ca) to estimate exposures to PM2.5 and nitrogen dioxide NO2 | For every 2.1 µg/m3 increase in PM2.5, there was an 11% increase in the risk of ADHD (HR: 1.11, 95% CI: 1.06, 1.17). After adjustment for green space, the adverse association was reduced but remained significant, from 1.11 (95% CI: 1.06, 1.17) to 1.03 (95% CI: 0.94, 1.12). No statistically significant associations were found between NO2 and ADHD incidence. In sex stratified analysis PM2.5 was associated with higher risk of ADHD among males (HR: 1.14, 95% CI: 1.08, 1.21) compared to females (HR: 1.03, 95% CI: 0.94, 1.13) | *** |
| NO2 | Childhood | **-** |

**┼**: [**+**] Statistically significant, [**-**] Statistically Non – significant

**Supplementary Table 4:** Associations between exposure to ambient air pollutants and Other Behavioural Problems

| **Author, year** | **Pollutant (s)** | **Exposure window** | **┼Key association** | **Exposure measurement** | **Outcome measured** | **Effect estimates** | **Overall study quality** |
| --- | --- | --- | --- | --- | --- | --- | --- |
| Ahmed, 2022 (65) | PM2.5 | Gestation through Childhood | **+** | Annual PM2.5 and NO2 estimates since 1996 from a land-use regression model. Maternal residential proximity to roadways were used as a proxy measure of exposure to traffic-related air pollution | Emotional and Behavioral Problems | Children’s lifetime PM2.5 exposures (5.9–7.1 µg/m3) OR: 1.27 (95% CI: 1.03, 1.57)  First year of life PM2.5 exposures (5.9–7.1 µg/m3) OR: 1.30 (95% CI: 1.05, 1.60)  Greater NO2 exposure in all exposure windows was not significantly associated | *** |
| Gestation |  |
| Infancy | **+** | Emotional and Behavioral Problems |
| Childhood |  |
| NO2 | Gestation through Childhood | **-** |
| Bradley, 2023 (25) | PM2.5 | Birth through Childhood |  | Ground pollution estimation via Inverse Distance Weighted (IDW) interpolation for NO2 and from Modern-Era retrospective analysis for Research and Applications version 2 (MERRA-2) for PM2.5. Annual averages were then obtained from this data | Emotional and Conduct symptoms | NO2 exposure in middle childhood and concurrent PLEs (OR=1.10, 95% CI=1.02–1.20).  PM2.5 exposure in middle childhood and concurrent PLEs (OR=1.05, 95% CI=1.01–1.09). There was no association with PM2.5 and NO2 exposures and emotional and conduct symptoms | ** |
| Birth | **-** |
| Childhood | **-** |
| Childhood | **+** | Psychotic Like Experiences (PLE) |
| NO2 | Birth | **-** |
| Childhood | **-** | Emotional and Conduct symptoms |
| Childhood | **+** | Psychotic Like Experiences |
| Forns, 2016 (32) | NO2 | Childhood | **+** | Weekly averaged NO2 concentrations were measured using Gradko Environmental passive dosimeters. Annual outdoor school levels were obtained by averaging the results | General Behavioral Development via SDQ total difficulties score | Higher SDQ total difficulties scores for an IQR increase in outdoor NO2 (IQR = 22.26 ug/m3) (aMR = 1.07; 95% CI: 1.01, 1.14) | * |
|
|
|
|
| Harris, 2016 | PM2.5 | Gestation through Childhood | **-** | Land use regression models, to estimate mean exposure PM2.5 during the third trimester of gestation, the first three years of life, the first six years of life, and the year preceding behavioral ratings | General Behavioral Development via BRIEF and SDQ | No significant association was found in covariate-adjusted models with BRIEF and SDQ scores | *** |
| Iyanna, 2023 (93) | PM2.5 | Gestation through Infancy | **-** | Daily estimates of air pollutants were aggregated to derive average exposures for each pollutant during two time periods: 1) pregnancy and 2) exposure during the participant’s first year of life (date of birth to first birthday) | Severity of social deficits associated with Autism | SRS Total T-scores and NO2 exposure during prenatal (ʙ = 0.4, 95% CI: 0.7, 1.6) and first year of life (ʙ = 0.7, 95% CI: 0.3, 1.6) | *** |
| Gestation | **-** |
| Infancy | **-** |
| NO2 | Gestation | **-** |
| Infancy | **-** |
| Joo, 2021 (63) | PM2.5 | Childhood | **+** | Exposure to fine particulate matter measured by averaging the worst levels of particles with an aerodynamic diameter ≤2.5 μm, PM2.5 during 2018 | Indirect association to Internalizing Behavioral Problems | PM2.5 was not associated with children's internalizing problem behavior but it was significantly associated with maternal depression s (b = 0.017, p < .001) which in turn was associated with children's internalizing problem behavior (b = 0.269, p < .001). The indirect effect of maternal depression on children's internalizing problem behavior (path 4: b =0.004, p < .01) was also statistically significant | *** |
| Loftus, 2020 (66) | NO2 | Gestation through Childhood | **+** | To estimate ambient NO2 at every residential location, validated universal kriging models (land-use regression with spatial smoothing) were applied based on air quality monitoring data from AQS and IMPROVE networks and modeling of over 300 geographic covariates | Externalizing Behavior | Prenatal NO2 exposure by 2 ppb higher had 6% higher externalizing behavior scores (95% CI: 1, 11).  Postnatal NO2 by 2 ppb higher had 8% higher externalizing scores (95% CI: 0, 16%).  NO2 was also associated with a higher odds externalizing problems (OR prenatal = 1.57 [95%CI: 1.02, 2.40]; OR postnatal = 1.96 [95%CI: 1.03, 3.71] | *** |
| Gestation | **+** |
| Childhood | **+** |
| Luminati, 2022 (62) | NO2 | Childhood | **-** | Annual mean outdoor NO2 concentrations at the home address of the children predicted by a land use regression (LUR) model based on NO2 measurements over 2 one-week periods at 80 locations in 2019 | Behavioral Problems | No association between yearly NO2 exposure and children's cognitive development (beta -0.05, 95% CI [-0.20; 0.10]) or behavioral problems (beta 0.02, 95% CI [-0.80; 0.12]) | *** |
| Ni, 2022 (71) | PM2.5 | Gestation through Infancy | **-** | Biweekly nitrogen dioxide (NO2), PM2.5 predictions from region-specific models were estimated, and averaged the exposure concentrations over each trimester, the whole pregnancy, and the two postnatal windows from childbirth to 2 y old and from 2 to 4 y old obtained | Behavioral Problems | Higher exposures to NO2 in the first trimester [b: 0.70; 0.13, 1.27) per 2 ppb NO2], the second trimester [b: 0.92, 0.31, 1.53) per 2 ppb NO2], and averaged over the whole pregnancy [b: 1.24: 0.39, 2.08 per 2 ppb NO2] were associated with more behavioral problems in children, however not significant.  Adverse association between PM2:5 in the first trimester and behavioral functioning [b: 1.32 (0.12, 2.52)], but insignificant.  Similar positive but non-significant associations postnatally | *** |
| 1st trimester | **-** |
| 2nd trimester | **-** |
| 3rd trimester | **-** |
| Pregnancy | **-** |
| Infancy | **-** |
| NO2 | 1st trimester | **-** |
| 2nd trimester | **-** |
| 3rd trimester | **-** |
| Pregnancy | **-** |
| Infancy | **-** |
| Qi, 2023 (35) | PM2.5 | Childhood Short Term | **-** | Hourly data of six air pollutants, i.e., PM2.5 and NO2 captured by 22 ambient monitoring stations were downloaded from the Wuhan Ecological Environment Bureau website. Daily averages of air pollutants (PM2.5 and NO2) were calculated, and the annual averages of each pollutant were summarized | Internalizing Behavior | **Short term**:  Odds of increase in NO2 (per 1 gμ/m3) with externalizing behaviors, ORs of 1.067 (95% CI 1.024, 1.111) at lag060 and 1.060 (95% CI 1.010, 1.113) at lag0120. The results showed that the association between NO2 and externalizing behavior was stronger in boys (p < 0.05) than in girls.  **Long term:** Odds of increase in NO2 (per 1 gμ/m3) with externalizing behaviors of 1.12 (95% CI 1.00-1.256)  Moreover, PM2.5 (OR=1.236 [95% CI 1.114, 1.371]) were positively associated with a higher risk of internalizing behaviors | * |
| Childhood Long Term | **+** |
| NO2 | Childhood Short Term | **+** | Externalizing Behavior |
| Childhood Long Term | **+** |
| Ren, 2019 (36) | PM2.5 | Gestation | **+** | Exposure in the first, second, and third trimesters was calculated as the average of the daily mean concentrations of each pollutant during the 1-13 weeks, 14-27 weeks and the 28 weeks to delivery separately. Individual exposure throughout pregnancy was computed as the mean of the average daily concentrations during the full gestational months | Total Behavioral difficulties | In single-pollutant models, during full gestation, positive associations were observed between exposure to NO2 (aOR = 1.204, 95% CI 1.042, 1.392), PM2.5 (aOR = 1.095, 95% CI 1.021, 1.176) and total difficulties, and exposure to PM2.5 (aOR = 1.053, 95% CI 1.000, 1.109) and prosocial behavior, respectively for 1 g/m3 increase in each air pollutant. In second trimester exposure to PM2.5 (aOR = 1.078, 95%CI 1.023, 1.137) was positively associated with total behavioral difficulties after adjusting for PM10 | * |
| 1st Trimester |  |
| 2nd Trimester | **+** |
| 3rd Trimester | **-** |
| Pregnancy | **+** |
| NO2 | 1st Trimester |  |
| 2nd Trimester | **-** |
| 3rd Trimester | **-** |
| Pregnancy | **+** |
| Shin, 2022 (38) | PM2.5 | Gestation through Childhood |  | Hourly air pollutant concentrations from 260 municipal and local district air quality fixed-site monitoring stations to compute 24-h mean for each measurement site | Internalizing Behavior and Total Problems | Increase in 1st trimester exposure to ambient air pollution was significantly associated with internalizing problems score 0.19 (0.05–0.32) per 1 μg/m3 increase in PM2.5 and 0.20 (0.02–0.37) per 1 ppb increase in NO2. Additionally, PM2.5 (0.16; 0.03-0.30) during the first trimester were significantly associated with total problems score. Not significant for postnatal exposure | * |
| 1st Trimester | **+** |
| 2nd Trimester |  |
| 3rd Trimester |  |
| Infancy | **-** |
| Childhood | **-** |
| NO2 | 1st Trimester | **+** | Internalizing Behaviour |
| 2nd Trimester |  |
| 3rd Trimester |  |
| Infancy | **-** |
| Childhood | **-** |
| Tokuda, 2023 (64) | PM2.5 | Gestation through Childhood |  | Exposure to outdoor PM2.5 during pregnancy and the first five years of life with a machine learning-based spatio temporal model. residential addresses geocoded. Average concentrations of outdoor PM2.5 for each trimester, the entire pregnancy, and 0–1, 1–3, and 3–5 years after childbirth. | Externalizing Behavior | Exposure during the first trimester, 0-1 and 3-5 years of age was associated with children's externalizing problems (OR 2.77: 95% CI: 1.05-7.29], OR 1.66 [95% CI: 1.05-2.62], and OR 1.80 [1.19-2.74] per IQR increase, respectively) | *** |
| 1st Trimester | **+** |
| 2nd Trimester | **-** |
| 3rd Trimester | **-** |
| Infancy | **+** |
| Childhood | **+** |
| Yu, 2022 (31) | NO2 | Gestation |  | Daily data of ambient NO2 levels Shanghai Environmental Monitoring Center (SEMC) via air quality monitoring stations. Weekly mean levels of exposure to ambient NO2 during gestational weeks 1–36 for each pregnant woman based on their dwelling districts in Shanghai by averaging the daily mean concentrations for each gestational week | Social Behaviour domain of neurodevelopmental outcomes | Each 10-μg/m3 increase in weekly average NO2 concentrations had adverse associations with social-behavior in weeks 31–36 (developmental-quotient changes: − 0.91% to − 0.20%, P-values < 0.05) | ** |
| 3rd Trimester | **+** |

**┼**: [**+**] Statistically significant, [**-**] Statistically Non – significant

**Supplementary Table 5:** Associations between exposure to ambient air pollutants and cognitive impairment/learning difficulties

| **Author, year** | **Pollutant (s)** | **Exposure window** | **┼Key association** | **Exposure measurement** | **Effect estimates** | **Overall study quality** |
| --- | --- | --- | --- | --- | --- | --- |
| Fuertes, 2016 (57) | PM2.5 | Childhood | **+** | Long-term (annual average) concentrations of NO2, PM2.5 mass were estimated to each participant's home address at birth, 10 years and 15 years using land-use regression (LUR) models originally derived as part of the “European Study of Cohorts for Air Pollution Effects” | For dyscalculia: Significant associated with PM2.5 (1.29 [1.03, 1.61]). No significant association with NO2 exposures across birth, 10 years and 15 years  For dyslexia: No associations with either NO2 or PM2.5 across birth, 10 years and 15 years addresses | *** |
| NO2 | Childhood | **-** |
| Kerin, 2018 (19) | NO2 | Gestation through Infancy | **-** | The CALINE4 line-source air quality dispersion model to estimate average concentrations for the specific locations and time periods (trimesters of gestation and first year of life) for each participant. A second approach was to use the regional air quality data for the exposure assignments for PM2.5 and nitrogen dioxide derived from the US Environmental Protection Agency’s Air Quality System data and geocoded to the participants' birth certificate and residential history | Overall prenatal or year 1 exposures of PM2.5 were not significantly associated with any of the scores on cognitive or adaptive scales in children with ASD.  During pregnancy, 11.0% (95% CI: −17.0%, −1.45%) decrease in VABS composite score per 2 SD increase in NO2 (6.82 ppb). NO2 was also associated with decreased performance on the communication (−13.3% [95% CI: −23.7%, −2.71%]) and socialization (−9.60% [95%CI: −18.6%, −0.43%]) | ** |
| Gestation | **+** |
| Infancy | **-** |
| PM2.5 | Gestation | **-** |
| Infancy | **-** |
| Kusters, 2022 (94) | NO2 and NOx | Gestation through Childhood | **-** | NO2 and NOx measured at 80 sites and PM 2,5 at 40 sites across Netherlands and Belgium. An annual mean concentration for each pollutant, to obtain mean exposure concentration for each air pollutant during pregnancy and childhood, using weighted air pollutant concentrations based on the time spent at each home address for all participants | Exposure to PM2.5 and NO2, NOx during pregnancy or childhood was not associated with a decline in full-scale IQ (0.77 points (95% CI -2.24; 3.78) per 5 ug/m3 increase in PM2.5) | *** |
| Gestation | **-** |
| Childhood | **-** |
| PM2.5 | Gestation through Childhood | **-** |
| Gestation | **-** |
| Childhood | **-** |
| Lertxundi, 2019 (72) | NO2 | Gestation | **-** | Weighted average concentration of PM2.5 measured during her whole pregnancy | The adjusted combined co-efficient were negative and not significant for PM2.5 and NO2 for each cognitive functions and motor skills. After stratifying by gender, the associations become more negative for boys, with some of the associations becoming statistically significant (memory and verbal both for PM2.5 and NO2), and global cognition, verbal, numeric and fine motor scale for NO2 | *** |
| Boys | **+** |
| PM2.5 | Gestation | **-** |
| Boys | **+** |
| Luminati, 2022 (62) | NO2 | Childhood | **-** | Annual mean outdoor NO2 concentrations at the home address of the children were predicted by a land use regression (LUR) model based on NO2 measurements over 2 one-week periods at 80 locations in 2019 | We found no association between yearly NO2 exposure and children's cognitive development (beta -0.05, 95% CI [-0.20; 0.10]) or behavioral problems (beta 0.02, 95% CI [-0.80; 0.12]) | *** |
| McGuinn, 2022 (29) | PM2.5 | Gestation | **+** | A satellite based model was used to assign PM2.5 exposure averages during pregnancy, each trimester, and the first year of life | For all participants, increase by 1 ug/m3 in PM2.5 exposure and MSEL composite scores for several developmental windows including the first (β: −0.35, 95% CI: −0.65, −0.05) and second (β: −0.27, 95% CI−0.57, −0.02) trimesters, as well as exposures averaged over the entire pregnancy period (β: −0.97, 95% CI: −1.69, −0.25) were significant | *** |
| 1st trimester | **+** |
| 2nd trimester | **+** |
| Pregnancy | **+** |
| Ni, 2022 (71) | NO2 | Gestation through Infancy | **-** | Biweekly nitrogen dioxide (NO2), PM2.5 predictions from region-specific models were estimated, and averaged the exposure concentrations over each trimester, the whole pregnancy, and the two postnatal windows from childbirth to 2 y old and from 2 to 4 y old obtained | Prenatal and Postnatal exposures to NO2 and PM2.5 is not associated significantly with cognitive decline or low IQ scores | *** |
| PM2.5 | Gestation through Infancy | **-** |
| Sentis, 2017 | NO2 | Gestation through Childhood | **-** | Using land-use regression models (LUR), regional annual averages of estimated prenatal and postnatal NO2 levels at the participants' residential addresses | Prenatal exposure to NO2 with an impaired standard error (SE) of the hit reaction time (HRT) (increase of 1.12 ms [95% CI; 0.22 - 2.02] per 10 μg/m3 increase in prenatal NO2) and increased omission errors (6% [95% CI; 1.01 to 1.11] per 10 μg/m3 increase in prenatal NO2).  Postnatal exposure to NO2 is similar but borderline significant increase of omission errors (5% [95% CI; =0.99 to 1.11] per 10 μg/m3 increase in postnatal NO2) | *** |
| Gestation | **-** |
| Childhood | **-** |
| Tokuda, 2023 (64) | PM2.5 | Gestation through Childhood | **-** | Exposure to outdoor PM2.5 during pregnancy and the first five years of life with a machine learning-based spatio temporal model. residential addresses geocoded. Average concentrations of outdoor PM2.5 for each trimester, the entire pregnancy, and 0–1, 1–3, and 3–5 years after childbirth | Outdoor PM2.5 during pregnancy and early childhood was not associated with decreased cognitive performance | *** |
| Gestation | **-** |
| Infancy | **-** |
| Childhood | **-** |

**┼**: [**+**] Statistically significant, [**-**] Statistically Non – significant
